# Supplementary material
Source: PubMed Central journal article supplement (PMC3811591)
Supplement: JB.00669-13_zjb999092877so1.pdf [file JB.00669-13_zjb999092877so1.pdf]

1 **Supplementary material**

2 Westbye *et al*

3

4 **Materials and methods**

5 **Construction of a *ΔphoB* mutant.** For the construction of the in-frame *ΔphoB* strain SBKOB16,  
6 the N-terminal and C-terminal regions of *phoB* (*rcc03498*) and flanking regions were amplified  
7 using the primers KOB1-F (ACCCTGTTCGGAGCTCGACCCGATCG) and KOB1-R  
8 (TGTTGCGCAGGATCCATCGATCAGCT), and KOB2-F  
9 (AATGGCGGCGCGGATCCCGTG) and KOB2-R  
10 (ATCTAGATGCAGGAAATGGCGGGGGCG) After digestion with BamHI (underlined), the  
11 two DNA fragments were ligated, re-amplified with KOB1-F and KOB2-R, and after digestion  
12 with SacI (**bold**) and XbaI (*italic*) cloned into the suicide plasmid pZJD29A that encodes  
13 gentamicin resistance and the *sacB* counter-selection marker (Z. Jiang and C. E. Bauer, personal  
14 communication). The resultant plasmid was conjugated from *E. coli* S17-1  $\lambda$  *pir* into *R.*  
15 *capsulatus* SB1003, and single-crossover recombinants were obtained by gentamicin selection  
16 on RCV plates. After growth in RCV broth for ~20 generations, second-crossover recombinants  
17 containing the desired mutation were obtained by plating on RCV agar medium containing 5%  
18 (wt/v) sucrose. The correct mutation was confirmed by the absence of the WT PCR-band and by  
19 DNA sequencing.

20 **Alkaline phosphatase activity.** Alkaline phosphatase activity was measured by the method of  
21 Wende et al (34). Fifty  $\mu$ l of culture were centrifuged, the cell pellet washed in 500  $\mu$ l dH<sub>2</sub>O and  
22 resuspended in 150  $\mu$ l dH<sub>2</sub>O. Six hundred  $\mu$ l of phosphatase buffer (0.1 M glycine-NaOH [pH  
23 10], 0.1 M NaCl, 5 mM *p*-nitrophenyl phosphate) were added and the mixture heated at 37 °C

24 until a faint yellow color appeared. A volume of 275  $\mu$ l of 0.5 M NaOH was added to stop the  
25 reaction and the samples centrifuged at 16,000 rcf for 90 s. Absorption of the supernatant at 405  
26 nm was measured and the activity calculated by the formula:  
27 
$$U = \frac{A_{405}}{time[min] \times 1.85 \times 10^{-2} [umol^{-1}cm^{-1}] \times 1cm}$$
 and normalised to culture turbidity at 660 nm. Sterile  
28 growth medium treated as above was used as blank.

## 29 **Results**

### 30 **A phosphate starvation response is not required for RcGTA release**

31 The *R. capsulatus* genome sequence encodes one PhoB homologue (*rcc03498*; 48% identical in  
32 amino acid sequence to the *E. coli* MG1655 PhoB). A  $\Delta$ *phoB* mutant did not induce alkaline  
33 phosphatase (Fig. S1A), indicating that the *R. capsulatus* PhoB homologue regulates alkaline  
34 phosphatase and presumable other Pho regulon genes. However little or no difference was  
35 observed in RcGTA transduction frequency or RcGTA capsid production (Figs. S1B and S1C).  
36 Similarly, RcGTA release did not require a near-complete depletion of phosphate from the  
37 culture medium, or an operon encoding homologues of the *E. coli* PstSCAB phosphate  
38 transporter (data not shown).

## 39 **Figures**

40

41

42

43

44

45

46

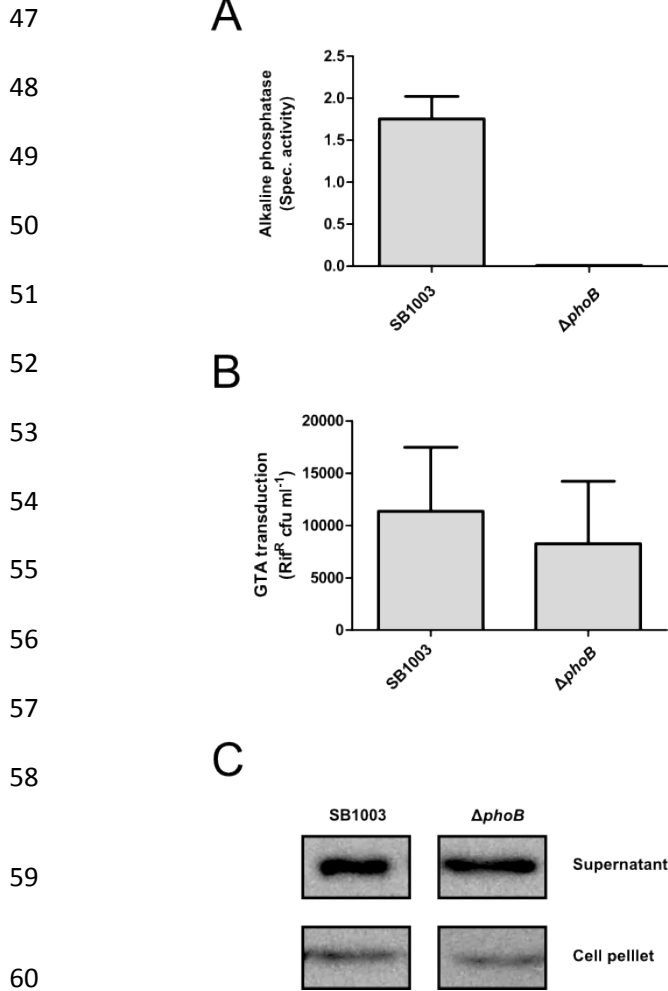

61 **Figure S1. RcGTA production is independent of PhoB.**

62 **A:** Alkaline phosphatase activity of WT strain SB1003 and SB1003  $\Delta phoB$  grown in RCVm  
 63 medium containing 0.5 mM KPO<sub>4</sub>. **B:** Transduction frequencies using culture supernatants from  
 64 WT strain SB1003 and SB1003  $\Delta phoB$  grown in RCVm medium containing 0.5 mM KPO<sub>4</sub>. **C:**  
 65 Western blots of WT strain SB1003 and SB1003  $\Delta phoB$  culture supernatant and cell pellet  
 66 fractions probed using GTA capsid protein antiserum; cultures grown in RCVm medium  
 67 containing 0.5 mM KPO<sub>4</sub>. Error bars represent standard deviation of three biological replicates.  
 68 Samples were normalised to culture turbidity at 660 nm.

70

A

71

72

73

74

75

76

B

77

78

79

80

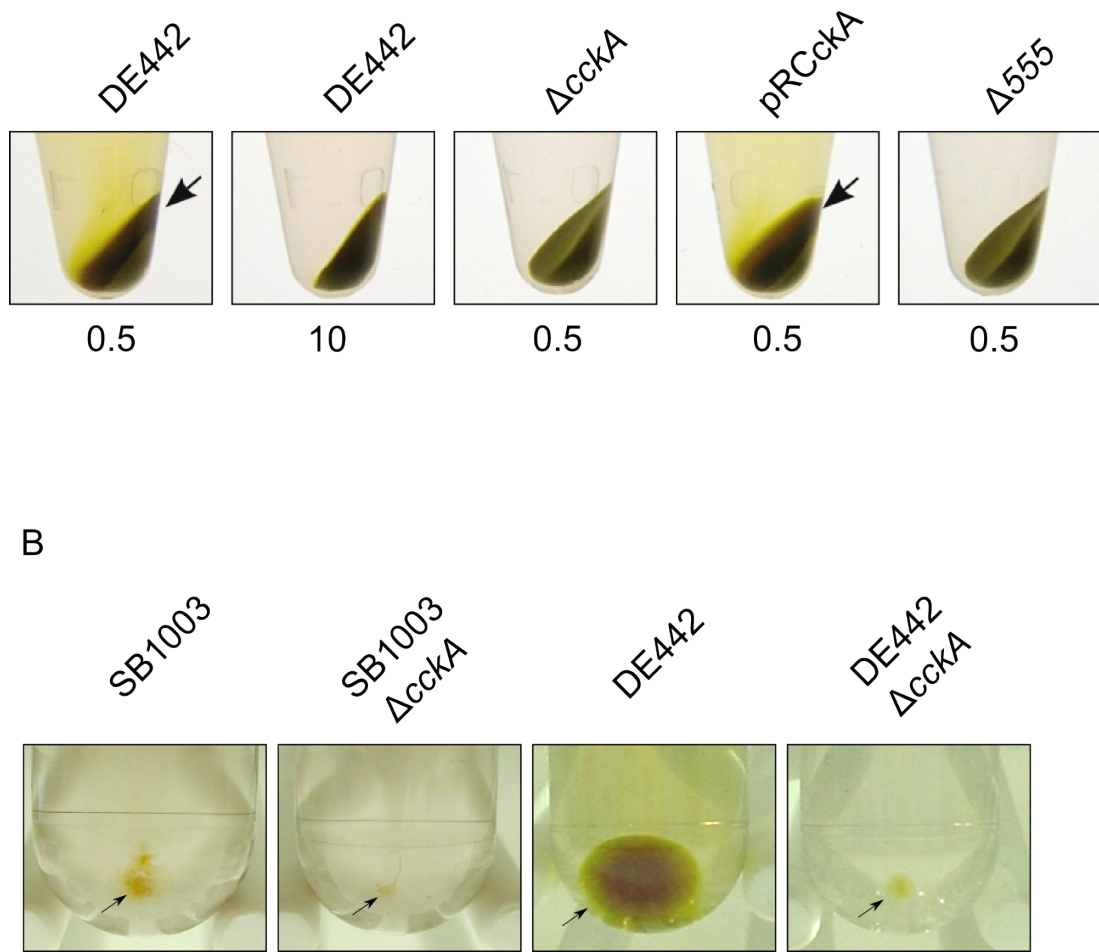

81 **Figure S2 Effects of culture medium phosphate concentration on cell lysis.**

82 **A:** RcGTA release correlates with formation of a pigmented culture supernatant and  
83 semitransparent layer on top of cell pellet (arrow). Initial phosphate concentration (mM) of  
84 growth medium is indicated. **B:** Ultracentrifugation of cleared culture supernatant. All samples  
85 were from cultures grown in RCVm medium containing phosphate concentrations as indicated  
86 (**A**), or 0.5 mM  $KPO_4$  (**B**).

87

88

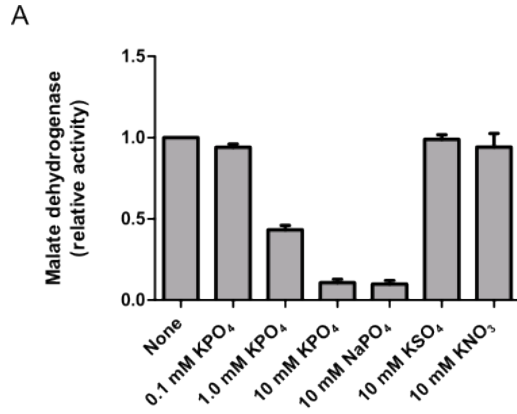

89

90

91

92

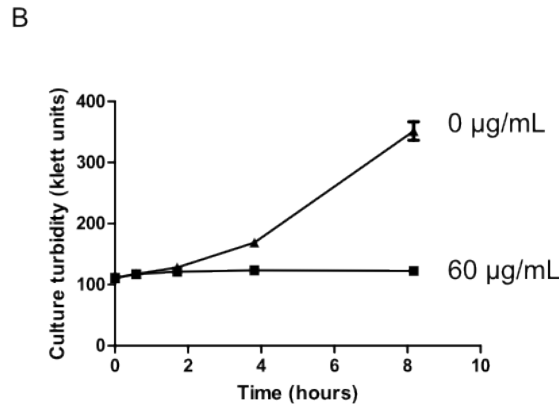

93

94

95

96

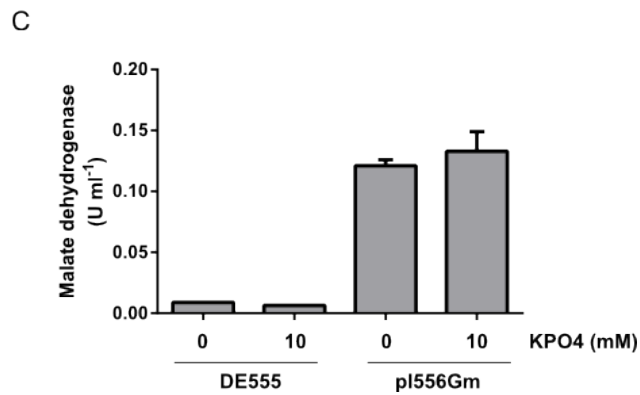

97

98

99

100

101 **Figure S3 Inhibition of cell lysis by phosphate and growth inhibition by Gentamicin.**

102 **A:** Malate dehydrogenase activity of supernatant of DE442 grown in 10 mM KPO<sub>4</sub> resuspended

103 in RCVm containing indicated salts. **B:** Growth curves of DE442 grown in 10 mM KPO<sub>4</sub>

104 resuspended in RCVm containing 10 mM KPO<sub>4</sub> and 0 or 60 µg/mL gentamicin sulphate. **C:**

105 Malate dehydrogenase activity of supernatant of DE555 and DE555 complemented with

106 pI556Gm grown in 10 mM KPO<sub>4</sub> resuspended in RCVm containing 0.5 or 10 mM KPO<sub>4</sub>. Cells  
107 were resuspended to an OD<sub>660</sub> of 5.0 (**A**) or 0.5 (**B**). Error bars represents standard deviation of  
108 three biological replicates.

109

110

111

112

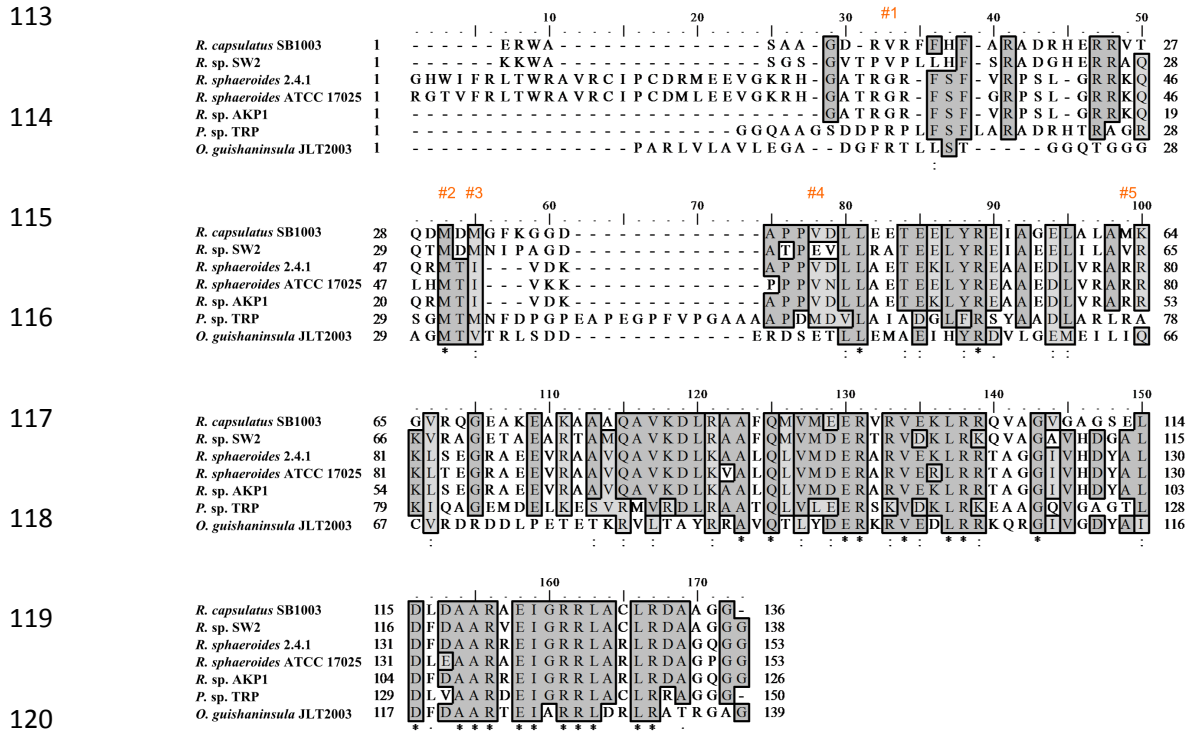

121 **Figure S4 Conserved residues in RcGTA orf *g1***

122 Multiple sequence alignment of N-terminally extended protein sequences of RcGTA orf *g1* and

123 selected top BlastP hits. Sequences included are *Rhodobacter capsulatus* SB1003

124 (YP\_003577834.1), *Rhodobacter* sp. SW2 (WP\_008032392.1 / Rsw2DRAFT\_2979),

125 *Rhodobacter sphaeroides* 2.4.1 (YP\_352526.1), *Rhodobacter sphaeroides* ATCC 17025

126 (YP\_001167279.1), *Rhodobacter* sp. AKP1 (WP\_009564490.1), *Paracoccus* sp. TRP

127 (WP\_010394130.1), *Oceaniovalibus guishaninsula* JLT2003 (WP\_007427541.1 /

128 OCGS\_2389). BlastP using annotated RcGTA orf *g1* was performed to the NCBI refseq\_protein

129 database. The coding sequence of selected top BlastP hits were extended upstream from the

130 annotated translational start codon by 30 amino acids or until stop codon was encountered.

131 Sequences were aligned using ClustalO 1.1.0 and graphical representation created in Bioedit

132 7.0.5.3 using 70% threshold for shading. Amino acids of putative start codons from Fig. 2 are  
133 indicated in orange.

134
